# Supplementary material for: Multiple free-radical-trapping and hydrogen-bonding-enhanced polyurethane foams with long-lasting flame retardancy, aging resistance, and toughness
Source: Royal Society of Chemistry journal article supplement (doi:10.1039/d4mh00607k), 2024-01-01
Supplement: d4mh00607k1.pdf [file d4mh00607k1.pdf]

**Multiple free-radical-trapping and hydrogen-bonding-enhanced polyurethane foams with long-lasting flame retardancy, aging resistance, and toughness**

Lei He <sup>a</sup>, Ming-Jun Chen <sup>b,\*</sup>, Fu-Rong Zeng <sup>a</sup>, Ting Wang <sup>b</sup>, Wei-Luo <sup>b</sup>, Dan-Xuan Fang <sup>a</sup>, Shuai-Qi Guo <sup>a</sup>, Cong Deng <sup>a</sup>, Hai-Bo Zhao <sup>a,\*</sup>, Yu-Zhong Wang <sup>a,\*</sup>

<sup>a</sup> *The Collaborative Innovation Center for Eco-Friendly and Fire-Safety Polymeric Materials, State Key Laboratory of Polymer Materials Engineering, National Engineering Laboratory of Eco-Friendly Polymeric Materials (Sichuan), College of Chemistry, Sichuan University, Chengdu 610064, China.*

<sup>b</sup> *School of Science, Xihua University, Chengdu, 610039, China.*

**\*Corresponding Authors:** Tel. & Fax:

E-mail: haibo@scu.edu.cn (Hai-Bo Zhao); cmjchem@126.com (Ming-Jun Chen);

yzwang@scu.edu.cn (Yu-Zhong Wang)

## Experimental

### Synthesis of DBP

Phosphorous-containing polyols (DBP) have been prepared as illustrated in Fig. S1 (a). First, benzaldehyde (10.61 g, 0.1 mol) and 150 mL ethanol were added into a 250 mL four-neck flask equipped with a reflux condenser, nitrogen inlet and stirrer. Subsequently, diethyl phosphite (13.81 g, 0.1 mol) was slowly added into the reaction flask via the dropping funnel at a temperature of 80 °C. After DEP was added, the reaction was continued for 4 h under a nitrogen atmosphere. The product was poured into a rotary evaporator at 60 °C under reduced pressure to obtain a clear liquid by removing ethanol. After cooling down to room temperature, a large amount of white product was precipitated. Then, the product (BP) was separated by suction filtration and dried at 80 °C for 6 h in a vacuum oven. Further synthesis of DBP by transesterification. BP (24.42 g, 0.1 mol) and tetrabutyl titanate (0.12 g) were added to a 100 mL four-neck flask equipped with a reflux condenser, nitrogen inlet and stirrer. Diethanolamine (12.62 g, 0.12 mol) was slowly added into the reaction flask via the dropping funnel at a temperature of 120 °C. The liquid product (DBP) was obtained with continuous agitation for 6 h with reduced pressure to remove by-products. GPC (DMSO): Mn: 1660 g/mol, Mw: 2091 g/mol. The polymer dispersity index (PDI) of DBP is 1.25. the degree of polymerization of DBP (n): 3~4. Hydroxyl content: 157.30 mg KOH/g. Phosphorus content: 9.3 wt%.

**Table S1.** Formulations of the FPUFs

| Samples                          | DEP-<br>330G<br>(php) | FR<br>(php) | H <sub>2</sub> O<br>(php) | DC2525<br>(php) | GK350D<br>(php) | TEOA<br>(php) | A1<br>(php) | A33<br>(php) | NE1070<br>(php) | MDI-<br>2412<br>(php) | Density<br>(kg/m <sup>3</sup> ) |
|----------------------------------|-----------------------|-------------|---------------------------|-----------------|-----------------|---------------|-------------|--------------|-----------------|-----------------------|---------------------------------|
| Neat FPUF                        | 100.00                | 0           | 0.71                      | 2.00            | 0.50            | 4.0           | 0.40        | 0.60         | 0.20            | 37.16                 | 151                             |
| FPUF/2DTAP                       | 100.00                | 2.00        | 0.68                      | 2.00            | 0.50            | 4.0           | 0.40        | 0.60         | 0.20            | 36.40                 | 147                             |
| FPUF/5DTAP                       | 100.00                | 5.00        | 0.66                      | 2.00            | 0.50            | 4.0           | 0.40        | 0.60         | 0.20            | 39.81                 | 152                             |
| FPUF/8DTAP                       | 100.00                | 8.00        | 0.61                      | 2.00            | 0.50            | 4.0           | 0.40        | 0.60         | 0.20            | 41.35                 | 148                             |
| FPUF/8DBP                        | 100.00                | 8.00        | 0.65                      | 2.00            | 0.50            | 4.0           | 0.40        | 0.60         | 0.20            | 40.51                 | 150                             |
| FPUF/8DMMP                       | 100.00                | 8.00        | 0.65                      | 2.00            | 0.50            | 4.0           | 0.40        | 0.60         | 0.20            | 36.72                 | 146                             |
| FPUF/8Tinuvlin-770               | 100.00                | 8.00        | 0.65                      | 2.00            | 0.50            | 4.0           | 0.40        | 0.60         | 0.20            | 36.72                 | 153                             |
| FPUF/5.7DMMP+2.3<br>Tinuvlin-770 | 100.00                | 8.00        | 0.65                      | 2.00            | 0.50            | 4.0           | 0.40        | 0.60         | 0.20            | 36.72                 | 150                             |

FR: flame retardant (DBP, DTAP, DMMP, Tinuvlin-770). php: parts per hundred polyether polyols by weight.

## Results and discussion

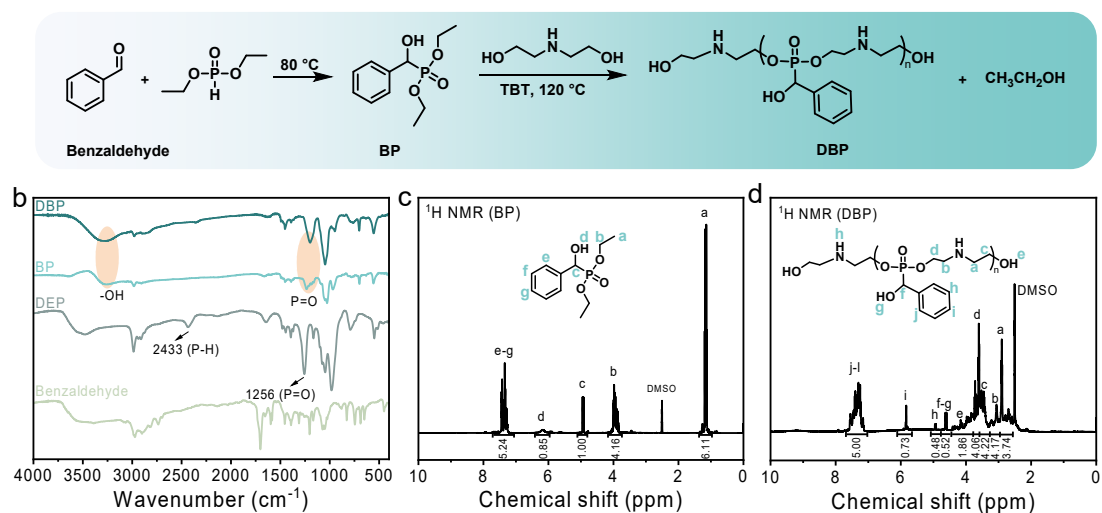

**Fig. S1.** (a) The synthesis route of DBP. (b) FTIR and (c, d) <sup>1</sup>H NMR of BP and DBP.

**Table S2.** Mechanical performance of neat FPUF and flame retardant FPUFs.

| Samples                     | Tensile strength (kPa) | Elongation at break (%) | Toughness (kJ/m <sup>3</sup> ) | Tear strength (N/m) | 75% compression set (%) |
|-----------------------------|------------------------|-------------------------|--------------------------------|---------------------|-------------------------|
| Neat FPUF                   | 49 ± 4                 | 50 ± 5                  | 19 ± 4                         | 129 ± 6             | 2.84                    |
| FPUF/2DTAP                  | 78 ± 3                 | 67 ± 4                  | 32 ± 3                         | 154 ± 8             | 2.90                    |
| FPUF/5DTAP                  | 83 ± 7                 | 74 ± 6                  | 40 ± 4                         | 180 ± 8             | 2.78                    |
| FPUF/8DTAP                  | 91 ± 6                 | 69 ± 3                  | 42 ± 2                         | 188 ± 5             | 2.60                    |
| FPUF/8DBP                   | 80 ± 4                 | 106 ± 3                 | 41 ± 3                         | 215 ± 7             | 2.80                    |
| FPUF/8DMMP                  | 49 ± 2                 | 77 ± 5                  | 25 ± 2                         | 177 ± 5             | 1.51                    |
| FPUF/8Tinuvín-770           | 54 ± 4                 | 71 ± 2                  | 22 ± 4                         | 169 ± 4             | 4.19                    |
| FPUF/5.7DMMP+2.3Tinuvín-770 | 51 ± 4                 | 72 ± 5                  | 26 ± 2                         | 172 ± 4             | 4.47                    |

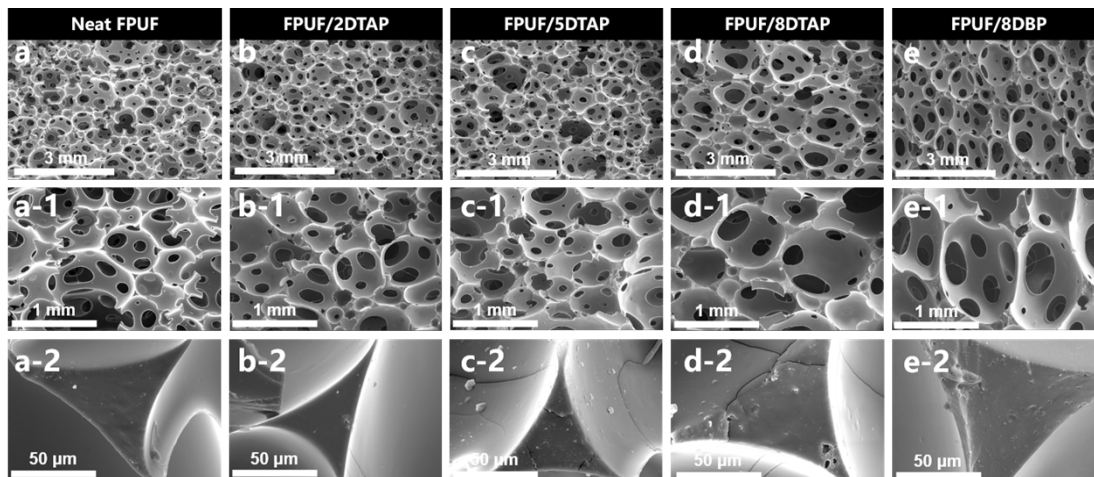

**Fig. S2.** The SEM images of fractured surface of neat FPUF (a, a-1, a-2), FPUF/2DTAP (b, b-1, b-2), FPUF/5DTAP (c, c-1, c-2), FPUF/8DTAP (d, d-1, d-2), and FPUF/8DBP (e, e-1, e-2).

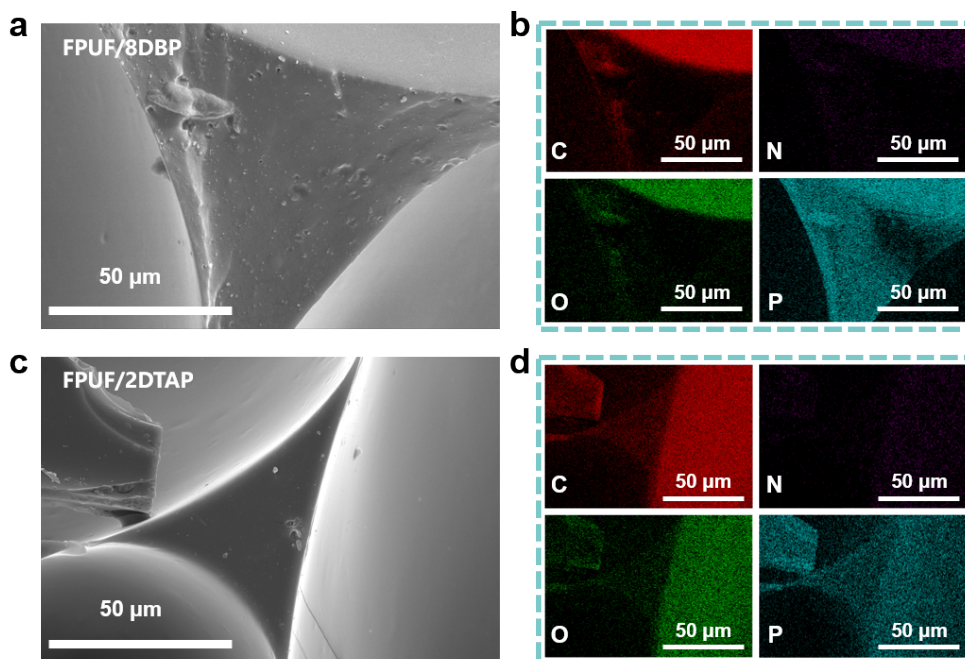

**Fig. S3.** The SEM images of fractured surface of neat FPUF (a, a-1, a-2), FPUF/2DTAP (b, b-1, b-2), FPUF/5DTAP (c, c-1, c-2), FPUF/8DTAP (d, d-1, d-2), and FPUF/8DBP (e, e-1, e-2).

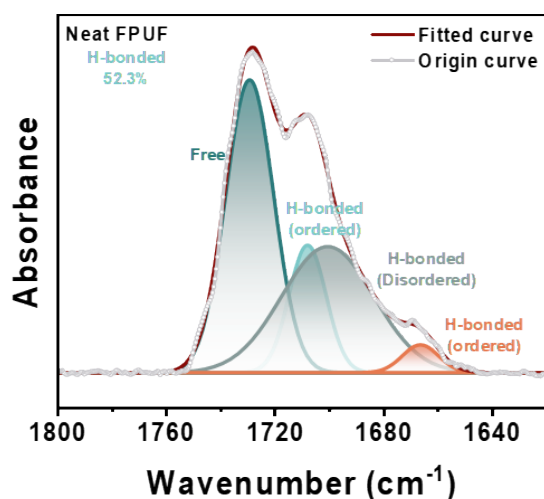

**Fig. S4.** FT-IR spectra of the neat FPUF in the C=O stretching vibration region.

**Table S3.** Summary of the assignment of the deconvoluted subpeaks in the FTIR C=O absorption bands for neat FPUF, FPUF/8DTAP and FPUF/8DBP.

| Assignment                      | Wavenumber (cm <sup>-1</sup> ) |             |           | Area (%)  |             |           |      |
|---------------------------------|--------------------------------|-------------|-----------|-----------|-------------|-----------|------|
|                                 | Neat FPUF                      | FPUF/8DTA P | FPUF/8DBP | Neat FPUF | FPUF/8DTA P | FPUF/8DBP |      |
| $\nu$ (C=O) urethaneamide ester | Free                           | 1729        | 1730      | 1730      | 47.7        | 35.9      | 40.7 |
|                                 | H-bonded (Ordered)             | 1708        | 1710      | 1709      | 14.4        | 36.2      | 56.2 |
| $\nu$ (C=O) amide               | H-bonded (Disordered)          | 1699        | 1691      | 1686      | 37.8        | 24.3      | 2.6  |
|                                 | H-bonded (Ordered)             | 1666        | 1658      | 1667      | 1.6         | 1.1       | 0.5  |
| Total degree of H-bonded        | -                              | -           | -         | 52.3      | 64.1        | 59.3      |      |

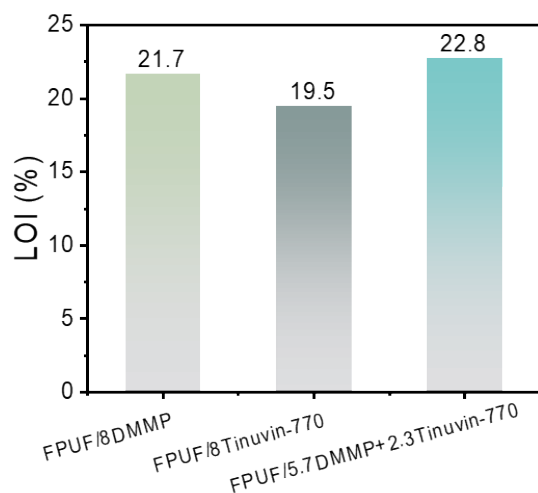

**Fig. S5.** LOI bar graph of FPUF/8DMMP, FPUF/8Tinuvín-770 and FPUF/5.7DMMP+2.3Tinuvín-770.

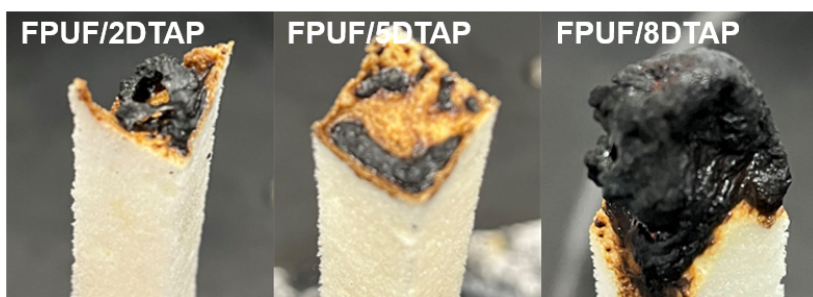

**Fig. S6.** Digital photos of LOI test for FPUF/2DTAP, FPUF/5DTAP and FPUF/8DTAP.

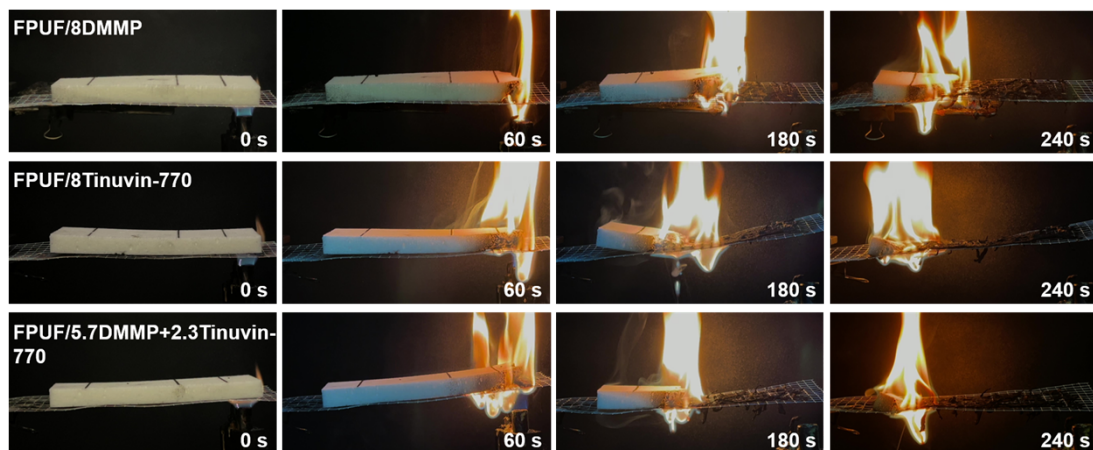

**Fig. S7.** Digital photos of horizontal combustion test for FPUF/8DMMP,

FPUF/8Tinuvin-770 and FPUF/5.7DMMP+2.3Tinuvin-770.

**Table S4.** Comparisons of DBP and DTAP with other flame retardant FPUFs that can pass the Cal TB 117 vertical burning test in recent reports.

| FR Structure                                        | FR content<br>(wt%) | Test results<br>(pass or fail) | $\Delta$ Tensile strength<br>(%) | $\Delta E_{ab}$<br>(%) | Ref. |
|-----------------------------------------------------|---------------------|--------------------------------|----------------------------------|------------------------|------|
| PTMA                                                | 5.8                 | -                              | -28.9                            | -56.7                  | [15] |
| HNPB                                                | 8.0                 | -                              | -38.5                            | +72.3                  | [16] |
| PDEO                                                | 6.3                 | Cal TB Pass                    | +18.2                            | -11.6                  | [24] |
| DMOP                                                | 6.3                 | Cal TB Pass                    | +9.3                             | +2.7                   | [25] |
| HAMPP                                               | 10.0                | -                              | +29.0                            | +75.9                  | [26] |
| DPM                                                 | 2.6                 | Cal TB Pass                    | +19.7                            | +58.7                  |      |
| DOM                                                 | 2.6                 | Cal TB Pass                    | -7.0                             | +18.2                  | [27] |
| DPE                                                 | 2.6                 | Cal TB Pass                    | +9.3                             | +21.2                  |      |
| BDMPP                                               | 6.4                 | Cal TB Pass                    | -3.2                             | +0.5                   | [28] |
| DMMP                                                | 6.4                 | Cal TB Pass                    | -2.2                             | +12.6                  | [29] |
| D-Mel                                               | 6.4                 | Cal TB Pass                    | +29.1                            | -14.0                  |      |
| D-DICY                                              | 6.4                 | Cal TB Pass                    | +47.3                            | -16.3                  | [30] |
| D-Urea                                              | 6.4                 | Cal TB Pass                    | +19.1                            | -6.0                   |      |
| TPT                                                 | 5.0                 | Cal TB Pass                    | -18.2                            | -5.8                   | [31] |
| MoS <sub>2</sub> -DOPO                              | 5.7                 | -                              | -6.0                             | -15.6                  | [32] |
| ZIF-8@Ti <sub>3</sub> C <sub>2</sub> T <sub>x</sub> | 4.0                 | -                              | +52.7                            | -30.2                  | [33] |



|                                                                    |      |             |       |        |      |
|--------------------------------------------------------------------|------|-------------|-------|--------|------|
| DPPMA                                                              | 3.3  | Cal TB Pass | -4.5  | +18.8  | [34] |
| Ti <sub>3</sub> C <sub>2</sub> T <sub>x</sub> @BPA@<br>PCL/DH-DOPO | 14.2 | Cal TB Pass | +25.0 | -30.1  | [35] |
| PPN                                                                | 3.5  | Cal TB Pass | +40.0 | +14.0  | [36] |
| CMA                                                                | 12.0 | Cal TB Pass | -     | -      | [43] |
| EDPPA                                                              | 6.4  | Cal TB Pass | -     | -      |      |
| EDPPO                                                              | 12.1 | Cal TB Pass | -     | -      | [44] |
| EDPMA                                                              | 12.1 | Cal TB Pass | -     | -      |      |
| TCDP                                                               | 12.6 | Cal TB Pass | -     | -      | [45] |
| MPBT                                                               | 10.0 | Cal TB Pass |       |        | [46] |
| DMPMA/TAMP<br>O                                                    | 12.1 | Cal TB Pass | -     | -      | [34] |
| DTAP                                                               | 5.1  | Cal TB Pass | +85.7 | +38.0  | This |
| DBP                                                                | 5.1  | Cal TB Fail | +63.3 | +112.0 | work |

**Table S5.** Vertical burning test of neat FPUF and flame retardant FPUFs.

| Samples               | After flame time (s) |         | After glow time (s) |         | Char length (mm) |  | Test results<br>(pass or fail) |
|-----------------------|----------------------|---------|---------------------|---------|------------------|--|--------------------------------|
|                       | Average              | Maximum | Average             | Average | Maximum          |  |                                |
|                       |                      |         |                     | e       |                  |  |                                |
| Requirements for pass | ≤5.0                 | ≤15.0   | ≤15.0               | ≤152.4  | ≤203.2           |  | Pass                           |
| Neat FPUF             | 83                   | 130     | 0                   | No      | Burn out         |  | fail                           |
| FPUF/2DTAP            | 45                   | 61      | 0                   | 200     | 220              |  | fail                           |
| FPUF/5DTAP            | 10                   | 13      | 0                   | 140     | 160              |  | fail                           |
| FPUF/8DTAP            | 1                    | 5       | 0                   | 100     | 140              |  | Pass                           |
| FPUF/8DBP             | 15                   | 21      | 0                   | 130     | 150              |  | fail                           |

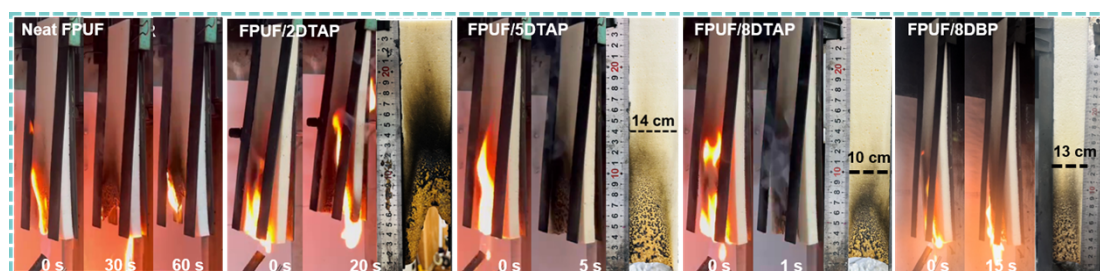

Fig. S8. Digital photos of neat FPUF and flame retardant FPUFs at different ignition time.

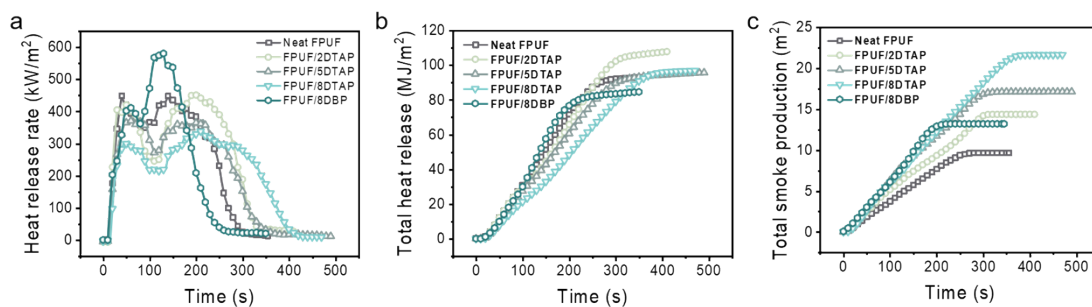

**Fig. S9.** Heat release rate (a), total heat release (b), and total smoke production (c) as a function of time for neat FPUF and flame retardant FPUFs.

**Table S6.** Cone calorimeter data for neat FPUF and flame retardant FPUFs <sup>a</sup>.

| Samples    | TTI<br>(s) | $t_p$<br>(s) | pHRR<br>(kW·m <sup>-2</sup> ) | FIGRA<br>(kW·m <sup>-2</sup> s <sup>-1</sup> ) | THR<br>(MJ·m <sup>-2</sup> ) | Av-EHC<br>(MJ·kg <sup>-1</sup> ) | TSP<br>(m <sup>2</sup> ) | Char yield<br>(wt%) |
|------------|------------|--------------|-------------------------------|------------------------------------------------|------------------------------|----------------------------------|--------------------------|---------------------|
| Neat FPUF  | 8 ± 1      | 48 ± 7       | 441 ± 18                      | 9.2 ± 0.3                                      | 96 ± 2                       | 27 ± 2                           | 12 ± 2                   | 1.3 ± 0.2           |
| FPUF/2DTAP | 9 ± 1      | 175 ± 15     | 458 ± 6                       | 2.6 ± 0.1                                      | 105 ± 3                      | 26 ± 1                           | 14 ± 1                   | 6.2 ± 0.3           |
| FPUF/5DTAP | 7 ± 2      | 213 ± 2      | 386 ± 2                       | 1.8 ± 0.1                                      | 93 ± 2                       | 25 ± 2                           | 17 ± 1                   | 8.4 ± 0.2           |
| FPUF/8DTAP | 8 ± 1      | 220 ± 5      | 347 ± 12                      | 1.6 ± 0.1                                      | 99 ± 4                       | 25 ± 1                           | 22 ± 2                   | 9.1 ± 0.4           |
| FPUF/8DBP  | 6 ± 2      | 135 ± 5      | 555 ± 25                      | 4.1 ± 0.2                                      | 88 ± 2                       | 23 ± 2                           | 14 ± 2                   | 2.4 ± 0.1           |

<sup>a</sup> TTI means time to ignition; pHRR represents the peak of heat release rate;  $t_p$  denotes time to pHRR; FIGRA is defined as the quotient of pHRR/ $t_p$ ; THR is total heat release; avEHC denotes the average effective heat of combustion of the volatiles; TSP is total

smoke production.

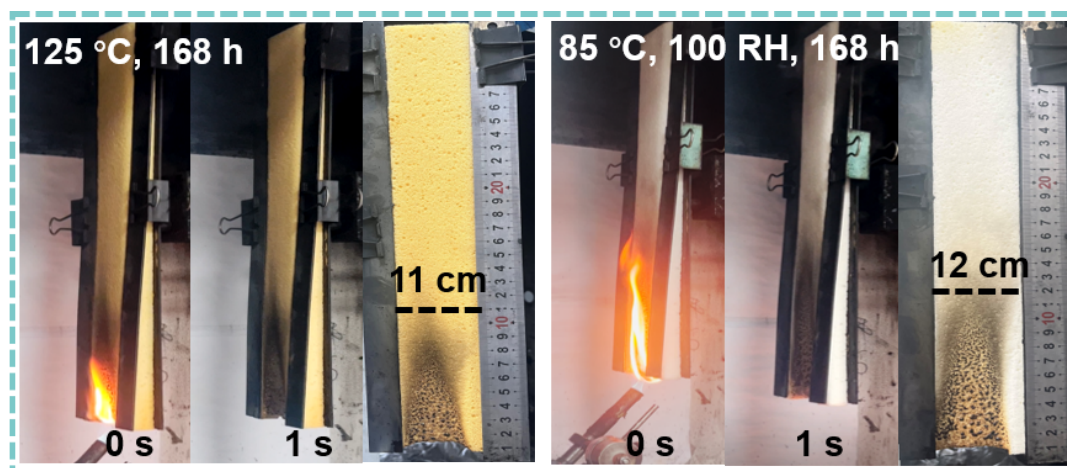

**Fig. S10.** Digital photos of FPUF/8DTAP at different ignition times after accelerated aging test.

**Table S7.** Vertical burning test of FPUF/8DTAP after accelerated aging test.

| Samples               | After flame time (s) |         | After glow time (s) |         | Char length (mm) |  | Test results<br>(pass or fail) |
|-----------------------|----------------------|---------|---------------------|---------|------------------|--|--------------------------------|
|                       | Average              | Maximum | Average             | Average | Maximum          |  |                                |
|                       |                      |         |                     | e       |                  |  |                                |
| Requirements for pass | ≤5.0                 | ≤15.0   | ≤15.0               | ≤152.4  | ≤203.2           |  | Pass                           |
| 125 °C, 168 h         | 1                    | 2       | 0                   | 110     | 120              |  | Pass                           |
| 85 °C, 100RH,         | 2                    | 4       | 0                   | 120     | 135              |  | Pass                           |

**Table S8.** LOI test data of neat FPUF and flame-retardant FPUFs after accelerated aging test at 125 °C.

| Samples    | LOI (%)<br>(0 h) | LOI (%)<br>(24 h) | LOI (%)<br>(72 h) | LOI (%)<br>(120 h) | LOI (%)<br>(168 h) |
|------------|------------------|-------------------|-------------------|--------------------|--------------------|
| Neat FPUF  | 18.5             | 18.2              | 18.0              | 18.0               | 18.3               |
| FPUF/2DTAP | 21.5             | 21.0              | 21.1              | 21.0               | 21.0               |
| FPUF/5DTAP | 22.5             | 22.5              | 22.5              | 22.1               | 22.0               |
| FPUF/8DTAP | 22.0             | 21.8              | 21.5              | 22.0               | 21.8               |
| FPUF/8DBP  | 21.0             | 21.1              | 21.0              | 21.2               | 21.0               |

**Table S9.** LOI test data of neat FPUF and flame-retardant FPUFs after accelerated aging test at 85 °C, 100 RH.

| Samples    | LOI (%)<br>(0 h) | LOI (%)<br>(24 h) | LOI (%)<br>(72 h) | LOI (%)<br>(120 h) | LOI (%)<br>(168 h) |
|------------|------------------|-------------------|-------------------|--------------------|--------------------|
| Neat FPUF  | 18.5             | 18.3              | 18.2              | 18.1               | 18.4               |
| FPUF/2DTAP | 20.5             | 20.3              | 20.3              | 19.8               | 20.0               |
| FPUF/5DTAP | 22.5             | 22.3              | 22.0              | 21.5               | 21.7               |
| FPUF/8DTAP | 22.0             | 22.1              | 22.0              | 21.7               | 22.0               |
| FPUF/8DBP  | 21.0             | 20.9              | 21.1              | 21.2               | 21.0               |

**Table S10.** Tensile strength and elongation at break of neat FPUF and flame-retardant FPUFs after accelerated aging test at 125 °C <sup>a</sup>.

| 125 °C     | 0 h         |            | 24 h        |            | 72 h        |            | 120 h       |            | 168 h       |            |
|------------|-------------|------------|-------------|------------|-------------|------------|-------------|------------|-------------|------------|
| Samples    | Ts<br>(kPa) | Eab<br>(%) |
| Neat FPUF  | 49±4        | 50±5       | 46±3        | 53±2       | 44±3        | 56±4       | 44±2        | 56±4       | 43±3        | 60±4       |
| FPUF/2DTAP | 78±3        | 67±4       | 69±5        | 61±2       | 61±5        | 55±3       | 60±4        | 54±4       | 63±2        | 52±1       |
| FPUF/5DTAP | 83±7        | 74±6       | 68±4        | 69±2       | 63±2        | 65±5       | 62±4        | 57±3       | 62±2        | 53±2       |
| FPUF/8DTAP | 91±6        | 69±3       | 77±2        | 68±4       | 76±2        | 65±3       | 74±3        | 57±2       | 75±3        | 56±4       |
| FPUF/8DBP  | 80±4        | 106±3      | 75±3        | 99±6       | 80±5        | 99±3       | 65±4        | 92±3       | 65±4        | 80±3       |

<sup>a</sup> Ts means Tensile strength; Eab represents the Elongation at break.

**Table S11.** Tensile strength and elongation at break of neat FPUF and flame-retardantFPUFs after accelerated aging test at 85 °C, 100 RH <sup>a</sup>.

| 85 °C, 100RH | 0 h         |            | 24 h        |            | 72 h        |            | 120 h       |            | 168 h       |            |
|--------------|-------------|------------|-------------|------------|-------------|------------|-------------|------------|-------------|------------|
| Samples      | Ts<br>(kPa) | Eab<br>(%) |
| Neat FPUF    | 49 ± 4      | 50 ± 5     | 44 ± 2      | 56 ± 3     | 44 ± 3      | 54 ± 4     | 40 ± 4      | 61 ± 3     | 44 ± 2      | 57 ± 3     |
| FPUF/2DTAP   | 78 ± 3      | 67 ± 4     | 57 ± 2      | 64 ± 4     | 64 ± 3      | 58 ± 4     | 56 ± 4      | 68 ± 6     | 58 ± 6      | 64 ± 4     |
| FPUF/5DTAP   | 83 ± 7      | 74 ± 6     | 64 ± 5      | 68 ± 2     | 65 ± 2      | 60 ± 2     | 70 ± 5      | 78 ± 3     | 68 ± 6      | 77 ± 4     |
| FPUF/8DTAP   | 91 ± 6      | 69 ± 3     | 65 ± 2      | 72 ± 5     | 68 ± 1      | 70 ± 3     | 72 ± 2      | 76 ± 4     | 68 ± 3      | 81 ± 2     |
| FPUF/8DBP    | 80 ± 4      | 106 ± 3    | 88 ± 2      | 100 ± 4    | 83 ± 1      | 94 ± 5     | 81 ± 4      | 93 ± 2     | 70 ± 3      | 89 ± 4     |

<sup>a</sup> Ts means Tensile strength; Eab represents the Elongation at break.

**Table S12.** LOI and yellowing index of FPUF/8DMMP, FPUF/8Tinuvín-770 and FPUF/5.7DMMP+2.3Tinuvín-770 after accelerated aging for 168 h.

| Samples                     | Original |      | 85 °C, 100 RH, 168 h |      | 125 °C, 168 h     |     |
|-----------------------------|----------|------|----------------------|------|-------------------|-----|
|                             | LOI      | LOI  | Δ Yellowing Index    | LOI  | Δ Yellowing Index |     |
|                             | (%)      | (%)  | (%)                  | (%)  | (%)               | (%) |
| FPUF/8DMMP                  | 21.7     | 20.4 | 4.63                 | 20.1 | 29.24             |     |
| FPUF/8Tinuvín-770           | 19.5     | 19.0 | 0.87                 | 18.8 | 18.32             |     |
| FPUF/5.7DMMP+2.3Tinuvín-770 | 22.8     | 21.2 | 1.66                 | 21.0 | 25.24             |     |

**Table S13.** Tensile strength and elongation at break of FPUF/8DMMP, FPUF/8Tinuvín-770 and FPUF/5.7DMMP+2.3Tinuvín-770 after accelerated aging for 168 h.

| Samples | Original         |                     | 85 °C, 100 RH, 168 h |                     | 125 °C, 168 h    |                     |
|---------|------------------|---------------------|----------------------|---------------------|------------------|---------------------|
|         | Tensile strength | Elongation at break | Tensile strength     | Elongation at break | Tensile strength | Elongation at break |
|         | (kPa)            | (%)                 | (kPa)                | (%)                 | (kPa)            | (%)                 |



|                                 |        |        |        |        |        |         |
|---------------------------------|--------|--------|--------|--------|--------|---------|
| FPUF/8DMMP                      | 49 ± 2 | 77 ± 5 | 39 ± 2 | 81 ± 3 | 22 ± 2 | 127 ± 3 |
| FPUF/8Tinovin-770               | 54 ± 4 | 71 ± 2 | 48 ± 3 | 82 ± 6 | 44 ± 3 | 124 ± 5 |
| FPUF/5.7DMMP+2.3Tinovin<br>-770 | 51 ± 4 | 72 ± 5 | 50 ± 2 | 87 ± 4 | 38 ± 1 | 120 ± 5 |

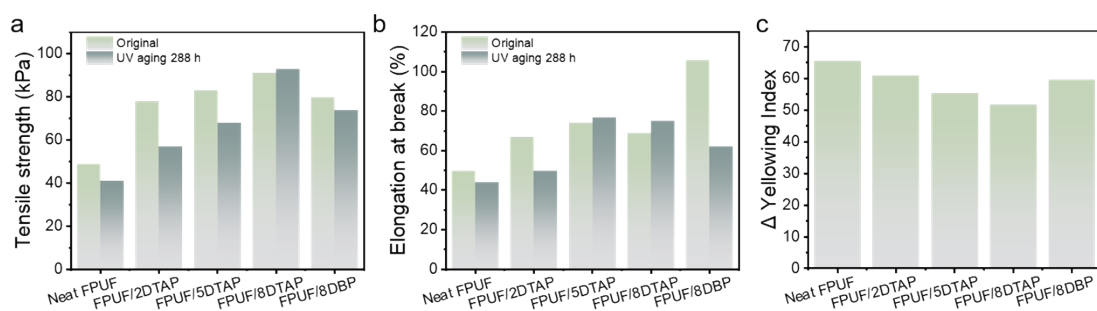

**Fig. S11.** (a) Tensile strength, (b) elongation at break and (c) yellowing index of neat FPUF and flame-retardant FPUF after UV aging for 288 h.

**Table S14.** Tensile strength and elongation at break of neat FPUF and flame-retardant FPUFs after UV aging for 288 h.

| UV aging   | Original               |                         | UV aging 288 h         |                         |
|------------|------------------------|-------------------------|------------------------|-------------------------|
|            | Tensile strength (kPa) | Elongation at break (%) | Tensile strength (kPa) | Elongation at break (%) |
| Neat FPUF  | 49 ± 4                 | 50 ± 5                  | 41 ± 6                 | 44 ± 4                  |
| FPUF/2DTAP | 78 ± 3                 | 67 ± 4                  | 57 ± 4                 | 50 ± 1                  |

|            |            |             |            |            |
|------------|------------|-------------|------------|------------|
| FPUF/5DTAP | $83 \pm 7$ | $74 \pm 6$  | $68 \pm 3$ | $77 \pm 4$ |
| FPUF/8DTAP | $91 \pm 6$ | $69 \pm 3$  | $93 \pm 2$ | $75 \pm 5$ |
| FPUF/8DBP  | $80 \pm 4$ | $106 \pm 3$ | $74 \pm 3$ | $62 \pm 2$ |

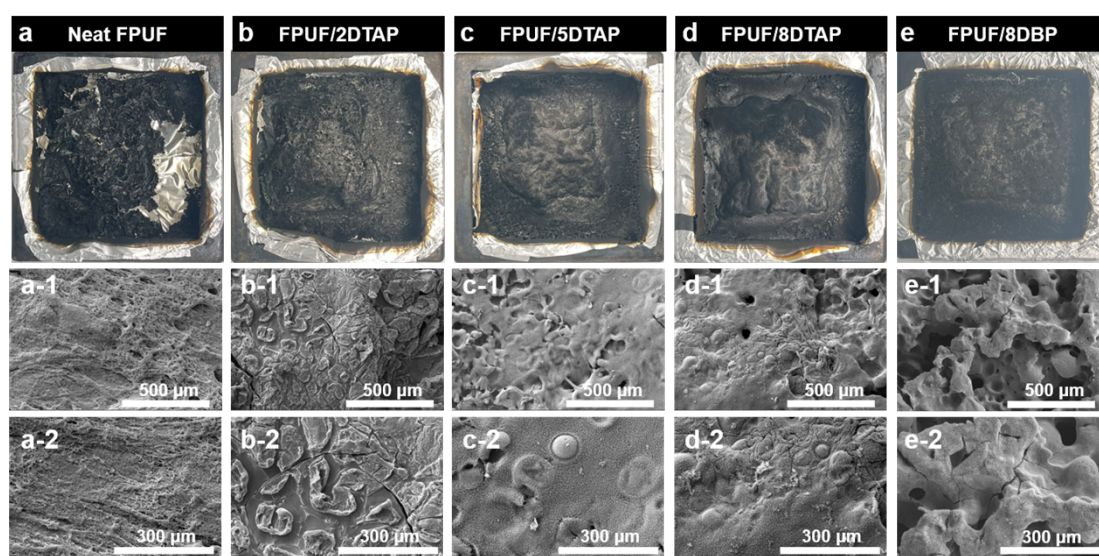

**Fig. S12.** Digital images of the char residues of (a) neat FPUF, (b) FPUF/2DTAP, (c) FPUF/5DTAP, (d) FPUF/8DTAP and (e) FPUF/8DBP after cone calorimeter test. SEM microphotographs of the external surfaces of (a-1, a-2) neat FPUF, (b-1, b-2) FPUF/2DTAP, (c-1, c-2) FPUF/5DTAP, (d-1, d-2) FPUF/8DTAP and (e-1, e-2) FPUF/8DBP.

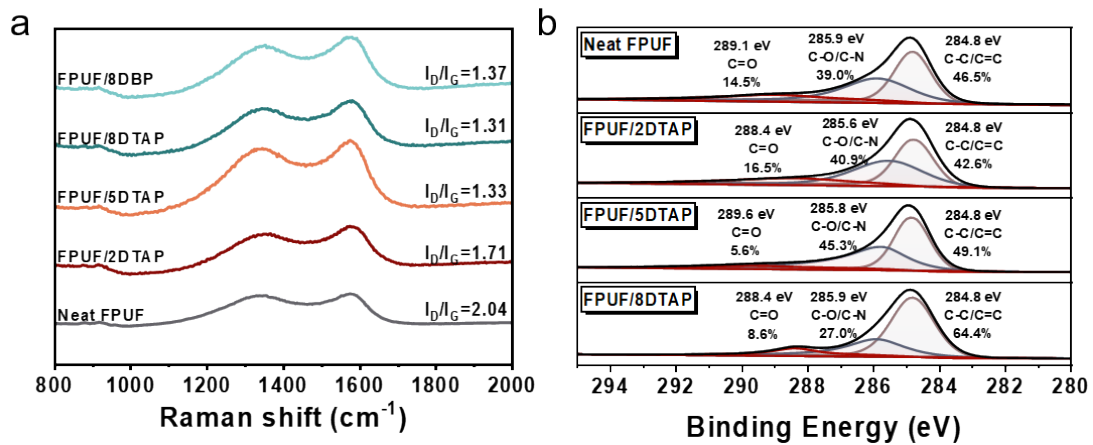

**Fig. S13.** (a) Raman spectra and (b)  $C_{1s}$  spectra of char residues after cone test for neat FPUF and flame-retardant FPUFs.
